# Supplementary material
Source: HighWire-hosted journal article supplement (https://www.jrheum.org/highwire/filestream/38304/field_highwire_adjunct_files/0/200185DataSuppl.pdf)
Supplement: 200185DataSuppl.pdf [file 200185DataSuppl.pdf]

**Supplementary Table 1: Determination of the optimal DAS28- $\gamma$ GT formula**

|                                           | DAS28<br>(r, p-value)    | DAS28-CRP<br>(r, p-value) | CRP<br>(r, p-value)      | HAQ<br>(r, p-value)     | PDUS-score<br>(r, p-value) | Framingham<br>(r, p-value) |
|-------------------------------------------|--------------------------|---------------------------|--------------------------|-------------------------|----------------------------|----------------------------|
| DAS28                                     |                          | <b>0.84 (&lt;0.001)</b>   | <b>0.56 (&lt;0.001)</b>  | <b>0.39 (&lt;0.001)</b> | <b>0.53 (&lt;0.001)</b>    | 0.06 (0.498)               |
| DAS28-CRP                                 | <b>0.84 (&lt;0.001)</b>  |                           |                          | <b>0.35 (&lt;0.001)</b> | <b>0.54 (&lt;0.001)</b>    | 0.03 (0.562)               |
| DAS28- $\gamma$ GT (1)*                   | <b>0.73 (&lt;0.001)</b>  | <b>0.89 (&lt;0.001)</b>   | <b>0.50 (p&lt;0.001)</b> | <b>0.42 (&lt;0.001)</b> | <b>0.44 (&lt;0.001)</b>    | 0.11 (0.223)               |
| <b>DAS28-<math>\gamma</math>GT (2)**</b>  | <b>0.60 (&lt;0.001)</b>  | <b>0.75 (&lt;0.001)</b>   | <b>0.50 (&lt;0.001)</b>  | <b>0.37 (&lt;0.001)</b> | <b>0.41 (0.002)</b>        | <b>0.20 (0.007)</b>        |
| <b>DAS28-<math>\gamma</math>GT (3)***</b> | <b>0.57 (&lt;0.001)</b>  | <b>0.70 (&lt;0.001)</b>   | <b>0.48 (&lt;0.001)</b>  | <b>0.35 (&lt;0.001)</b> | <b>0.39 (0.004)</b>        | <b>0.30 (0.001)</b>        |
| DAS28- $\gamma$ GT (4)****                | <b>0.39 (p&lt;0.001)</b> | <b>0.54 (&lt;0.001)</b>   | <b>0.44 (&lt;0.001)</b>  | <b>0.32 (&lt;0.001)</b> | 0.22 (0.240)               | <b>0.35 (&lt;0.001)</b>    |
| DAS28- $\gamma$ GT (5)*****               | <b>0.31 (&lt;0.001)</b>  | <b>0.45 (&lt;0.001)</b>   | <b>0.41 (&lt;0.001)</b>  | <b>0.29 (0.002)</b>     | 0.12 (0.521)               | <b>0.38 (&lt;0.001)</b>    |
| $\gamma$ GT                               | 0.003 (0.970)            | 0.11 (0.237)              | <b>0.30 (0.002)</b>      | 0.17 (0.085)            | 0.11 (0.254)               | <b>0.44 (&lt;0.001)</b>    |

DAS: Disease Activity Score, HAQ: Health Assessment Questionnaire, CRP: C-Reactive Protein

\*  $0.56*\sqrt{TJ-28}+0.28*\sqrt{SJ-28}+0.7*\ln(\gamma GT)+0.14*GH$

\*\* $0.56*\sqrt{TJ-28}+0.28*\sqrt{SJ-28}+1.5*\ln(\gamma GT)+0.14*GH$

\*\*\* $0.56*\sqrt{TJ-28}+0.28*\sqrt{SJ-28}+2*\ln(\gamma GT)+0.14*GH$

\*\*\*\* $0.56*\sqrt{TJ-28}+0.28*\sqrt{SJ-28}+3*\ln(\gamma GT)+0.14*GH$

\*\*\*\*\* $0.56*\sqrt{TJ-28}+0.28*\sqrt{SJ-28}+4*\ln(\gamma GT)+0.14*GH$

**Supplementary Figure 1:** Distribution of  $\gamma$ GT activity (UI/L) in our study sample

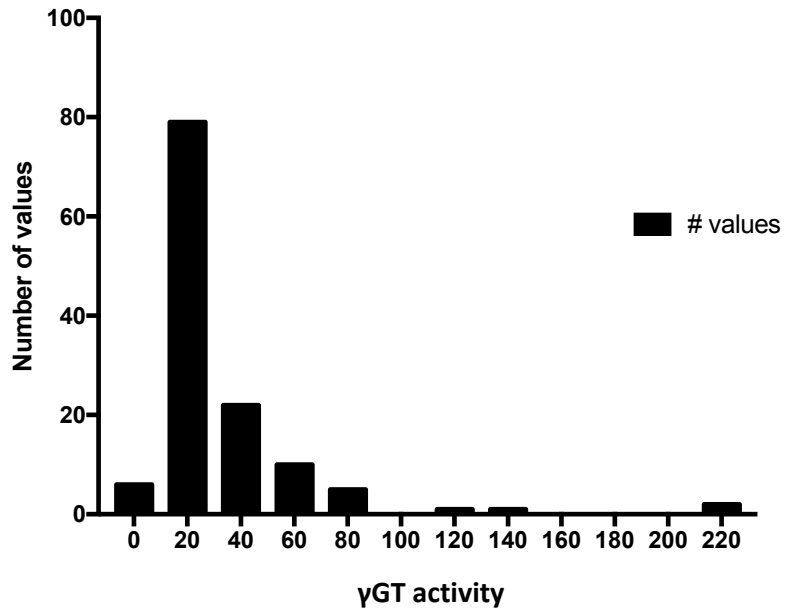

**Supplementary Table 2: Multivariate logistic regression analysis including moderate/high cardiovascular risk (Framingham risk score >10%) as the dependent variable**

| <b>Variables*</b>                        | <b>Univariate p-value</b> | <b>Odds ratio (95% CI)</b> | <b>p-value</b> |
|------------------------------------------|---------------------------|----------------------------|----------------|
| <b>BMI &gt;30 kg/m<sup>2</sup></b>       | 0.036                     | 1.05 (0.30-3.64)           | 0.935          |
| <b>Metabolic syndrome</b>                | <0.001                    | 16.19 (1.72-152.80)        | 0.015          |
| <b><math>\gamma</math>GT &gt;35 IU/L</b> | <0.001                    | 3.42 (1.27-9.22)           | 0.014          |
| <b>DAS28-CRP &gt;5.1</b>                 | 0.065                     | 3.99 (0.37-43.00)          | 0.253          |

*BMI: Body Mass Index, DAS: Disease Activity Score, CRP: C-Reactive Protein, CI Confidence Interval*

*\*Age, gender, smoking status, high blood pressure, diabetes, dyslipidemia were not entered as covariates since they are used to calculate the Framingham cardiovascular risk score and directly interact with it.*

**Supplementary Figure 2: ROC curve analysis assessing the discriminating capacities of DAS28- $\gamma$ GT and DAS28 to identify patients with active disease (A: DAS28-CRP>3.2 and B: DAS28-CRP>5.1)**

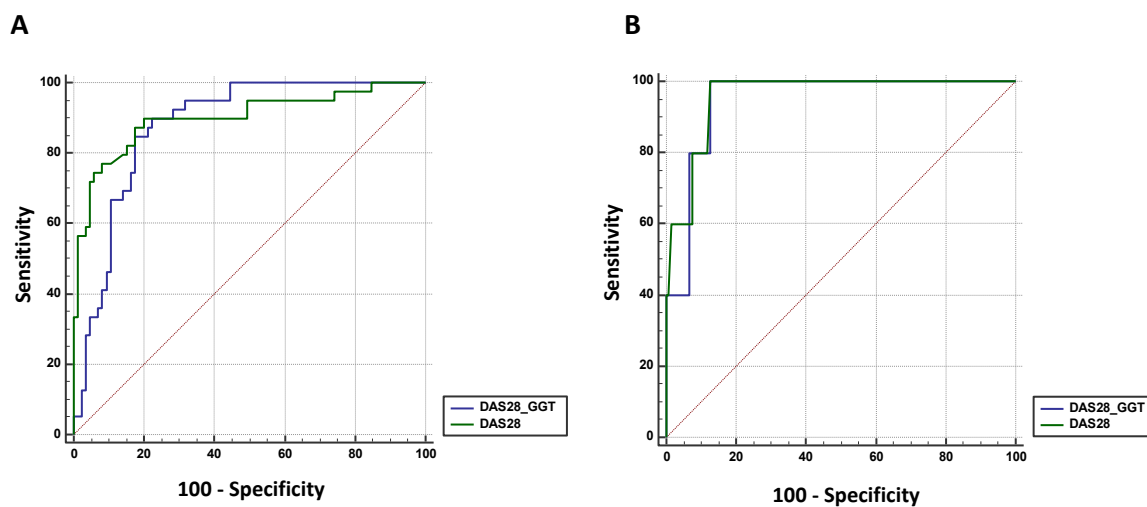

**Supplementary Table 3: DAS28- $\gamma$ GT levels according to joint disease activity and cardiovascular risk**

|                                             | Number of patients | Joint disease activity |         |                | Cardiovascular risk |                  |             |
|---------------------------------------------|--------------------|------------------------|---------|----------------|---------------------|------------------|-------------|
|                                             |                    | Remission              | LDA     | Active disease | Low (<10%)          | Medium (10%-20%) | High (>20%) |
|                                             |                    | n (%)                  | n (%)   | n (%)          | n (%)               | n (%)            | n (%)       |
| <b>DAS28-<math>\gamma</math>GT &lt;5.5</b>  | 11                 | 11 (100)               | 0 (0)   | 0 (0)          | 11 (100)            | 0 (0)            | 0 (0)       |
| <b>5.5≤DAS28-<math>\gamma</math>GT ≤7.5</b> | 58                 | 39 (67)                | 14 (24) | 5 (9)          | 34 (59)             | 14 (24)          | 10 (17)     |
| <b>DAS28-<math>\gamma</math>GT &gt;7.5</b>  | 60                 | 4 (7)                  | 21 (35) | 36 (58)        | 27 (45)             | 20 (33)          | 13 (22)     |

*Remission: DAS28-CRP<2.6, LDA, Low disease activity: 2.6≤DAS28-CRP≤3.2, Active disease: DAS28-CRP>3.2*

**Supplementary Figure 3: Proposed algorithm for the use of DAS28- $\gamma$ GT in clinical practice, based on the results obtained in our cohort**

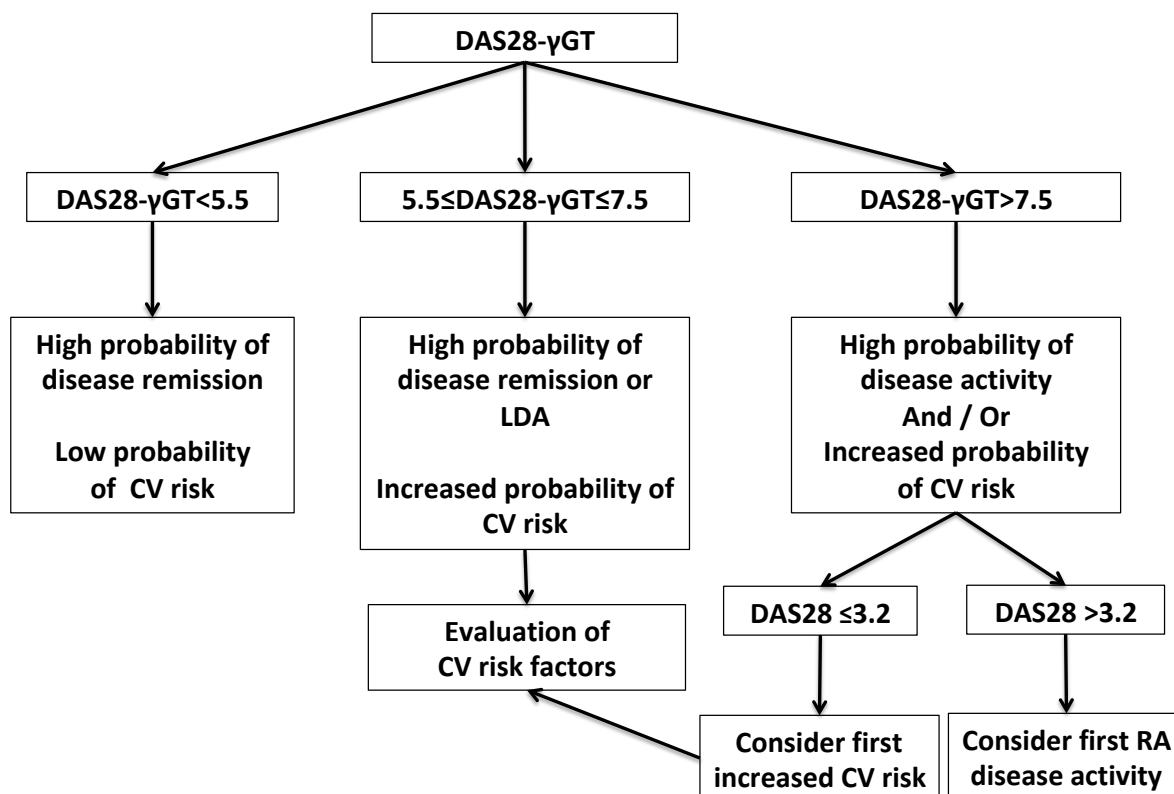

*DAS: Disease Activity Score, CV: Cardiovascular, RA: Rheumatoid Arthritis, LDA: Low Disease Activity (DAS28 < 3.2). Remission is defined by a DAS28 < 2.6*
